# Supplementary material
Source: MDPI journal article supplement (https://www.mdpi.com/2227-9717/12/5/1017)
Supplement: s1 [file s1]

# Supplementary Materials

## FILE S1:

Details of the measurement conditions used in the analytical methods developed at the Centre of Analytical Chemistry Łukasiewicz—IMN for the determination of elements in ferrosilicon magnesium alloys.

### 1. Inductively Coupled Plasma Optical Emission Spectrometry (ICP-OES)

Determination of Mg, Al, Ca, Ce, La, Ti, Cr, Mn, Ba and P using Ultima 2 ICP-OES spectrometer from Horiba Yobin-Yvon (Lyon, France)

#### Selected analytical lines

| Element | Analytical line length $\lambda$ [nm] |
|---------|---------------------------------------|
| Mg      | 285.213                               |
| Al      | 396.152                               |
| Ca      | 422.673                               |
| Ce      | 413.380                               |
| La      | 333.749                               |
| Ba      | 455.403                               |
| Ti      | 336.121                               |
| Cr      | 205.552                               |
| Mn      | 257.610                               |
| P       | 178.229                               |

#### Measurement parameters

|                                  |                   |
|----------------------------------|-------------------|
| Generator power                  | 1100 W            |
| Argon plasma flow                | 15 l/min          |
| Argon flow through the nebulizer | 0,8 l/min         |
| Shielding argon flow             | 0,2 l/min         |
| Sample flow                      | 1,0 ml/min        |
| Nebulizer                        | Teflon, MIRA MIST |
| Spray Chamber                    | Teflon, cyclonic  |
| Injector                         | Alumina 2 mm      |

Determination of Mg, Al, Ca, Ce, La, Ti, Cr, Mn, Ba and P using a 5300V ICP-OES spectrometer from Perkin Elmer (Cracow, Poland)

#### Selected analytical lines

| Element | Analytical line length $\lambda$ [nm] |
|---------|---------------------------------------|
| Fe      | 259.939                               |
| Ca      | 393.366                               |
| Si      | 288.158                               |
| Ni      | 231.604                               |
| Al      | 394.401                               |
| Mn      | 259.372                               |
| Ti      | 334.940                               |
| Mg      | 285.213                               |
| P       | 178.221                               |
| Cu      | 324.752                               |



### 3. Flame Atomic Absorption Spectrometry (FAAS)

Determination of Mg, Al, Ca, Cr, and Mn using a CE 3300 AAS-FAAS (Thermo Scientific, Dreieich, Germany)

#### Measurement parameters

|                                          | Al                                             | Mg                                             | Ca                                             | Mn                                | Cr                                             |
|------------------------------------------|------------------------------------------------|------------------------------------------------|------------------------------------------------|-----------------------------------|------------------------------------------------|
| Analytical line length $\lambda$<br>[nm] | 309.3                                          | 285.2                                          | 422.7                                          | 279.5                             | 357.9                                          |
| lamp current [mA]                        | 10                                             | 6                                              | 6                                              | 12                                | 12                                             |
| background correction                    | turned on                                      | turned on                                      | turned on                                      | turned on                         | turned on                                      |
| slot width [nm]                          | 0.5                                            | 0.5                                            | 0.5                                            | 0.2                               | 0.5                                            |
| type of flame                            | N <sub>2</sub> O-C <sub>2</sub> H <sub>2</sub> | N <sub>2</sub> O-C <sub>2</sub> H <sub>2</sub> | N <sub>2</sub> O-C <sub>2</sub> H <sub>2</sub> | air-C <sub>2</sub> H <sub>2</sub> | N <sub>2</sub> O-C <sub>2</sub> H <sub>2</sub> |
| burner length [cm]                       | 5                                              | 5                                              | 5                                              | 10                                | 5                                              |
| acetylene flow [l/min]                   | 4.2                                            | 3.9                                            | 4.2                                            | 1.0                               | 4.2                                            |
| burner height [mm]                       | 11                                             | 7                                              | 11                                             | 7                                 | 8                                              |
| Measurement time [s]                     | 3                                              | 3                                              | 3                                              | 3                                 | 3                                              |
| the number of repetitions                | 3                                              | 3                                              | 3                                              | 3                                 | 3                                              |
